# Supplementary material for: Public health measures on COVID-19 in North Korea: a quantitative analysis of media programmes in 2020–2022
Source: HighWire-hosted journal article supplement (doi:10.1136/bmjopen-2022-069492), 2023-07-01
Supplement: bmjopen-2022-069492supp001_data_supplement.pdf [file bmjopen-2022-069492supp001_data_supplement.pdf]

## Supplementary figures

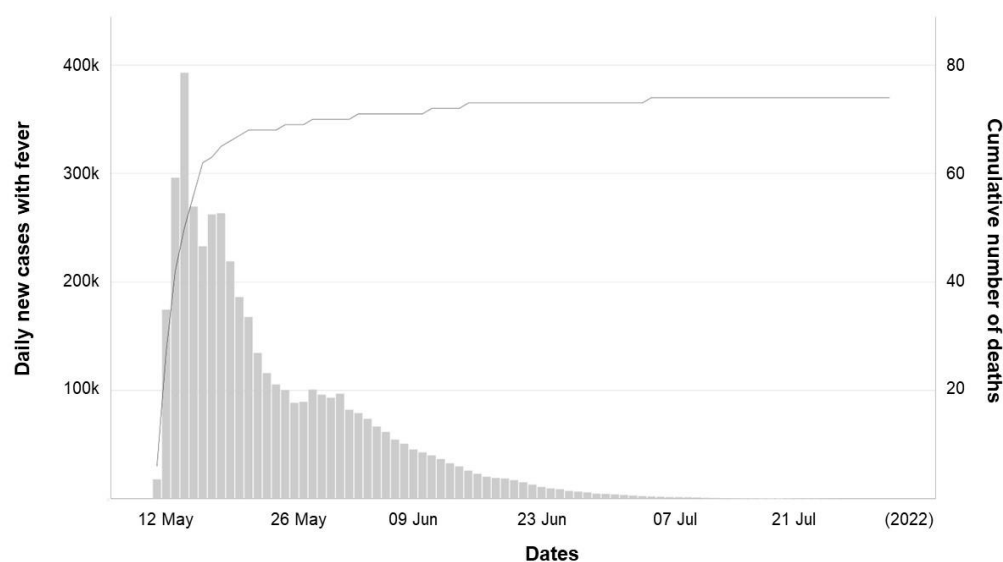

Supplementary figure 1. Daily new cases with fever (bar graph) and cumulative number of deaths (line graph), based on the Korean Central News Agency (KCNA) data collected by 38 North.

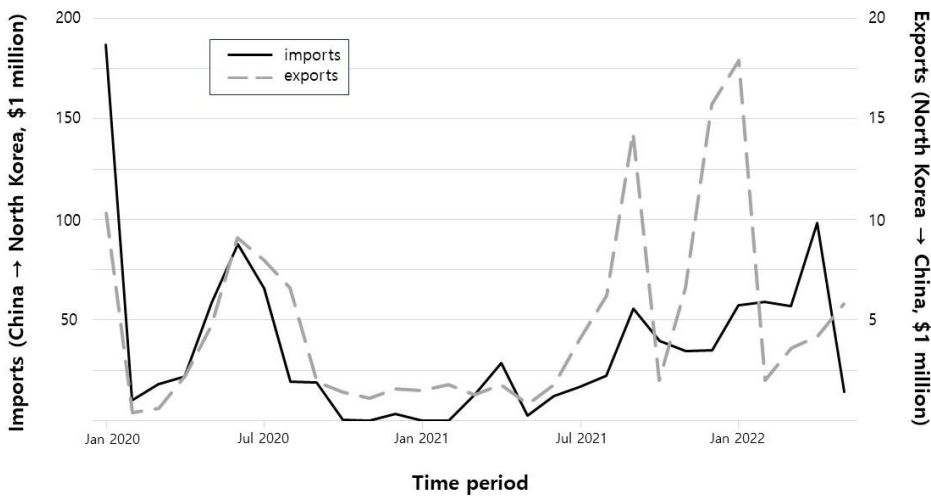

Supplementary figure 2. Trend of exports and imports between North Korea and China each month, based on the data from *the Korea International Trade Association*.

Supplementary tables

Supplementary table 1. Classification criteria and keywords of each subgroup.

| Group                           | Subgroup                                      | Classification criteria and keywords                                                                                                                                    |
|---------------------------------|-----------------------------------------------|-------------------------------------------------------------------------------------------------------------------------------------------------------------------------|
| COVID-19 statistics             | (a-1) COVID-19 statistics in North Korea      | Programs on daily (or cumulative) figures of COVID-19 related fever cases and deaths inside the country                                                                 |
|                                 | (a-2) COVID-19 statistics outside North Korea | Programs on daily (or cumulative) figures of COVID-19 confirmed cases and deaths worldwide                                                                              |
| Clinical aspects                | (b-1) explanation on COVID-19                 | Programs explaining basic information on the characteristics of coronavirus (e.g., features of the coronavirus variants, defense mechanism of cell against coronavirus) |
|                                 | (b-2) preventive measures                     | Programs introducing preventive measures of COVID-19 in each environment (e.g., preventive measures in public place or home)                                            |
|                                 | (b-3) instructions for medication usage       | Programs concerning the medication usage in each target population (e.g., medication usage in pregnant women, children, or diabetic patients)                           |
|                                 | (b-4) home-care management                    | Programs instructing self-quarantined patients or their family (e.g., hygiene management, simple tips to handle clinical symptoms)                                      |
|                                 | (b-5) instructions for post-COVID conditions  | Programs concerning post-COVID symptoms (e.g., instructions to manage musculoskeletal or gastrointestinal symptoms remaining after COVID-19 infection)                  |
| Structural and societal aspects | (c-1) national disease control system         | Programs concerning the control system and management by the health authorities                                                                                         |
|                                 | (c-2) propaganda materials                    | Programs with propaganda features to enhance solidarity and exert pressure not to violate guidance                                                                      |

Supplementary table 2. Detailed characteristics of KCNA programs on COVID-19.

| Broadcast<br>time period |      | (a) COVID-19<br>statistics |       | (b) clinical aspects |       |       |       |       | (c) structural and<br>societal aspects |       | Total |
|--------------------------|------|----------------------------|-------|----------------------|-------|-------|-------|-------|----------------------------------------|-------|-------|
|                          |      | (a-1)                      | (a-2) | (b-1)                | (b-2) | (b-3) | (b-4) | (b-5) | (c-1)                                  | (c-2) |       |
| 2020                     | Jan  | 0                          | 10    | 6                    | 0     | 0     | 0     | 0     | 0                                      | 0     | 16    |
|                          | Feb  | 0                          | 84    | 30                   | 17    | 0     | 0     | 0     | 0                                      | 0     | 131   |
|                          | Mar  | 0                          | 83    | 22                   | 86    | 0     | 0     | 0     | 0                                      | 0     | 191   |
|                          | Apr  | 0                          | 77    | 0                    | 14    | 0     | 0     | 0     | 0                                      | 0     | 91    |
|                          | May  | 0                          | 27    | 0                    | 0     | 0     | 0     | 0     | 0                                      | 0     | 27    |
|                          | June | 0                          | 2     | 0                    | 0     | 0     | 0     | 0     | 0                                      | 0     | 2     |
|                          | July | 0                          | 0     | 1                    | 0     | 0     | 0     | 0     | 5                                      | 3     | 9     |
|                          | Aug  | 0                          | 21    | 3                    | 0     | 0     | 0     | 0     | 0                                      | 35    | 59    |
|                          | Sept | 0                          | 14    | 4                    | 0     | 0     | 0     | 0     | 0                                      | 23    | 41    |
|                          | Oct  | 0                          | 12    | 5                    | 0     | 0     | 0     | 0     | 0                                      | 20    | 37    |
|                          | Nov  | 0                          | 11    | 0                    | 10    | 0     | 0     | 0     | 0                                      | 25    | 46    |
|                          | Dec  | 0                          | 12    | 0                    | 15    | 0     | 0     | 0     | 0                                      | 45    | 72    |
| 2021                     | Jan  | 0                          | 11    | 0                    | 18    | 0     | 0     | 0     | 0                                      | 43    | 72    |
|                          | Feb  | 0                          | 25    | 0                    | 9     | 0     | 0     | 0     | 0                                      | 33    | 67    |
|                          | Mar  | 0                          | 65    | 2                    | 7     | 0     | 0     | 0     | 0                                      | 49    | 123   |
|                          | Apr  | 0                          | 50    | 0                    | 5     | 0     | 0     | 0     | 0                                      | 43    | 98    |
|                          | May  | 0                          | 63    | 0                    | 6     | 0     | 0     | 0     | 0                                      | 59    | 128   |
|                          | June | 0                          | 58    | 0                    | 2     | 0     | 0     | 0     | 0                                      | 54    | 114   |
|                          | July | 0                          | 55    | 0                    | 0     | 0     | 0     | 0     | 0                                      | 54    | 109   |
|                          | Aug  | 0                          | 52    | 0                    | 0     | 0     | 0     | 0     | 0                                      | 52    | 104   |
|                          | Sept | 0                          | 49    | 0                    | 0     | 0     | 0     | 0     | 0                                      | 48    | 97    |
|                          | Oct  | 0                          | 48    | 0                    | 0     | 0     | 0     | 0     | 0                                      | 49    | 97    |
|                          | Nov  | 0                          | 42    | 0                    | 0     | 0     | 0     | 0     | 0                                      | 43    | 85    |
|                          | Dec  | 0                          | 52    | 0                    | 0     | 0     | 0     | 0     | 0                                      | 53    | 105   |
| 2022                     | Jan  | 0                          | 57    | 0                    | 0     | 0     | 0     | 0     | 0                                      | 56    | 113   |
|                          | Feb  | 0                          | 37    | 0                    | 0     | 0     | 0     | 0     | 0                                      | 42    | 79    |
|                          | Mar  | 0                          | 58    | 0                    | 0     | 0     | 0     | 0     | 0                                      | 61    | 119   |
|                          | Apr  | 0                          | 44    | 0                    | 0     | 0     | 0     | 0     | 0                                      | 49    | 93    |
|                          | May  | 67                         | 33    | 14                   | 8     | 49    | 64    | 17    | 8                                      | 86    | 346   |
| Total                    |      | 67                         | 1,152 | 87                   | 197   | 49    | 64    | 17    | 13                                     | 1,025 | 2,671 |

Note. The programs were classified according to the subgroups as follows: (a-1) COVID-19 statistics in North Korea, (a-2) COVID-19 statistics outside North Korea, (b-1) explanation of COVID-19, (b-2) preventive measures, (b-3) instruction for medication usage, (b-4) home-care management, (b-5) instruction for post-COVID conditions, (c-1) national disease control system, (c-2) propaganda materials.

Supplementary table 3. Correlation analysis between media coverage and trade volume.

| KCNA programs on COVID-19<br>(Included time period) | Trade volume<br>(Imports and exports) |          | Imports  |          | Exports  |          |
|-----------------------------------------------------|---------------------------------------|----------|----------|----------|----------|----------|
|                                                     | <i>r</i>                              | <i>p</i> | <i>r</i> | <i>p</i> | <i>r</i> | <i>p</i> |
|                                                     |                                       |          |          |          |          |          |
| January 2020 to December 2020 (12mo)                | -.484                                 | .111     | -.468    | .125     | -.665*   | .018     |
| January 2020 to December 2021 (24mo)                | -.470*                                | .020     | -.472*   | .020     | -.284    | .178     |
| January 2020 to May 2022 (29mo)                     | -.313                                 | .099     | -.324    | .087     | -.075    | .700     |

Note. KCNA=Korean Central News Agency.

\*  $p < .05$ .
